# Supplementary material
Source: PubMed Central journal article supplement (PMC6598929)
Supplement: 12250_2017_4057_MOESM1_ESM.pdf [file 12250_2017_4057_MOESM1_ESM.pdf]

## Electronic Supplementary Material

### Antiviral activity of quercetin-3- $\beta$ -O-D-glucoside against Zika virus infection

Gary Wong<sup>1,2,3,4#</sup>, Shihua He<sup>1#</sup>, Vinayakumar Siragam<sup>1#</sup>, Yuhai Bi<sup>2,3</sup>, Majambu Mbikay<sup>5,6</sup>, Michel Chretien<sup>5,6</sup>, Xiangguo Qiu<sup>1,4</sup>✉

1. Special Pathogens Program, Public Health Agency of Canada, Winnipeg R3E 3R2, Canada
2. Shenzhen Key Laboratory of Pathogen and Immunity, State Key Discipline of Infectious Disease, Shenzhen Third People's Hospital, Shenzhen 511700, China
3. CAS Key Laboratory of Pathogenic Microbiology and Immunology, Institute of Microbiology, Chinese Academy of Sciences, Beijing 100101, China
4. Department of Medical Microbiology, University of Manitoba, Winnipeg R3E 0J9, Canada
5. Functional Endoproteolysis Laboratory, Clinical Research Institute of Montreal, Montreal H2W 1R7, Canada
6. Chronic Disease Program, Ottawa Hospital Research Institute, Ottawa K1H 8L6, Canada

Supporting information to DOI: 10.1007/s12250-017-4057-9

A

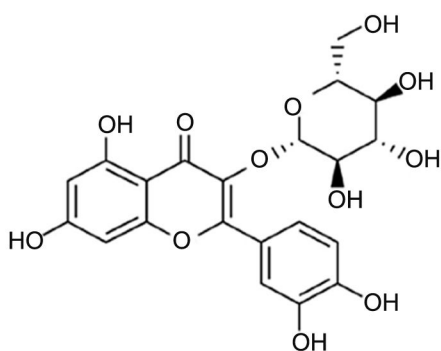

Quercetin-3- $\beta$ -O-D-glucoside (Q3G)

B

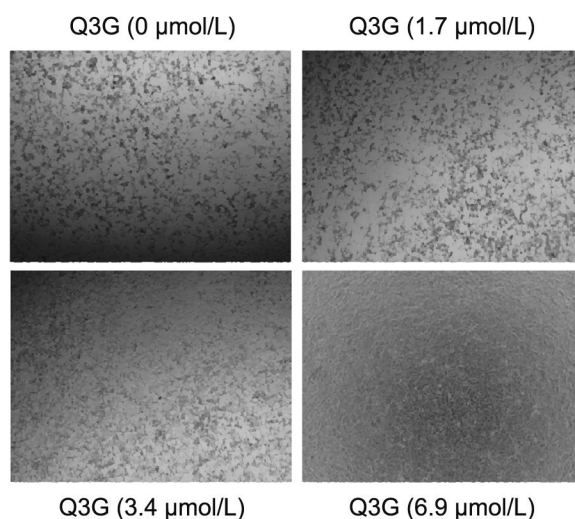

Figure S1. (A) Chemical structure of quercetin-3- $\beta$ -O-D-glucoside (Q3G). (B) Inhibitory effect of Q3G at the indicated concentrations of ZIKV PLCa1\_ZV (MOI = 0.05) in Vero cells, as visualized under a microscope (at 4x magnification) at 4 dpi.
